# Supplementary material for: CT Perfusion as a Predictor of the Final Infarct Volume in Patients with Tandem Occlusion
Source: MDPI journal article supplement (doi:10.3390/jpm13020342), 2023-02-16
Supplement: s1 [file s1]

## CT perfusion as predictor of the final infarct volume in patients with tandem occlusion

Giordano Lacidogna <sup>1,\*</sup>, Francesca Pitocchi <sup>2</sup>, Alfredo Paolo Mascolo <sup>1</sup>, Federico Marrama <sup>1</sup>, Federica D'Agostino <sup>1</sup>, Alessandro Rocco <sup>1</sup>, Francesco Mori <sup>1</sup>, Ilaria Maestrini <sup>1</sup>, Federico Sabuzi <sup>3</sup>, Armando Cavallo <sup>2</sup>, Daniele Morosetti <sup>3</sup>, Francesco Garaci <sup>2</sup>, Francesca Di Giuliano <sup>2</sup>, Roberto Floris <sup>2</sup>, Fabrizio Sallustio <sup>1</sup>, Marina Diomedi <sup>1</sup> and Valerio Da Ros <sup>3</sup>

Affiliation 1; Stroke Center, Department of Systems Medicine, University Hospital of Rome "Tor Vergata", Viale Oxford 81, 00133, Rome, Italy

Affiliation 2; Diagnostic Imaging Unit, Department of Biomedicine and Prevention, University of Rome Tor Vergata, Viale Oxford 81, Rome, 00133, Italy.

Affiliation 3; Department of Biomedicine and Prevention, University Hospital of Rome "Tor Vergata", Viale Oxford 81, Rome, Italy

\* Correspondence: Giordano Lacidogna g.lacidogna@libero.it; Tel.+390620903423

### Supplemental material

#### Results

- 83 patients (26%) were treated for concomitant extracranial ICA and MCA occlusion (*Tandem group-TG*) and in 49 cases (59%) successful recanalization (mTICI 2b-3) was reached. 29 subjects (34,9%) underwent a CTP perfusion study implemented with RAPID software. 5 patients (17,2%) had a wake up stroke and 1 patient (3.44%) had an unknown onset time stroke. 6 subjects (24.1%) showed altered perfusional AIF and VOF curves and were excluded from the analysis; 1 patient in the tandem group experienced an intracranial re-occlusion and was excluded from the analysis as per inclusion criteria (Figure S1 Suppl. Mat.). No embolism in a new vascular territory, vasospasm, and femoral artery access injuries occurred in the sample. No occlusion in anterior cerebral artery were reported.

Among 167 patients (52,3%) who experienced an AIS exclusively due to a MCA occlusion 146 reached successful recanalization (45,8%) (*Control Group - CG*). Among them, 42 controls were selected according to the execution of a CT perfusion study with RAPID software before treatment. Among these, 5 patients (11,9%) with altered perfusional AIF and VOF curves were excluded. 10 patients (23.8%) had a wake up stroke, 3 patients (7.1%) had an unknown onset time stroke (Figure S1).

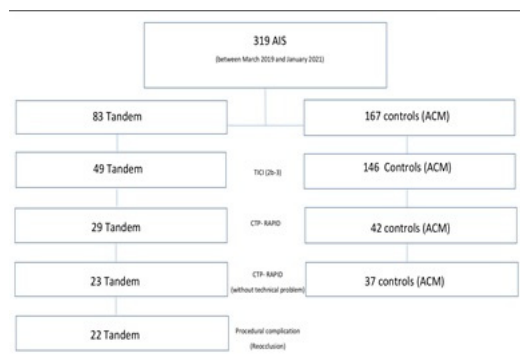

Figure S1. recruitment flow chart

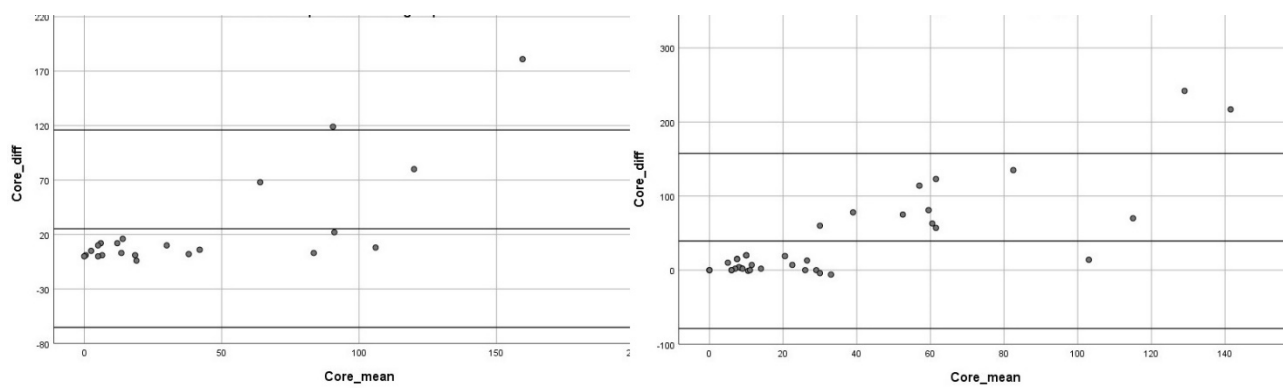

Figure S2 Distribution of mRS outcome.

- To control for potential effects of minor hemorrhages on FIV we performed a one-way ANOVA, controlled with Brown-Forsythe, due to the lack of homogeneity of variance among groups. A significant difference was found between groups ( $F = 15,73$ , between groups  $df = 4$ , within groups  $df = 54$ ,  $p < 0,0001$ ). Tukey's HSD Test for multiple comparisons found that the mean value of FIV was significantly different between PH2 group and all other groups ( $p < 0,0001$ , 95% CI=53,14-115,88 with NO-ICH,  $p < 0,001$ , 95%CI= 23,77- 122,14 with HI1 group,  $p < 0,0001$  95%CI = 42,37-140,74 with HI2 group,  $p < 0,001$  95% CI= ,91- 84,90 with PH1group) and between PH1 group and NO-ICH group ( $p = 0,022$  95%CI= 4,14-79,08). Notably no significant difference was detected between PH1 group, HI1 group and H2group. The same significant differences remain when controlling for potential effect of minor hemorrhages on differences between PIC and FIV. Means and standard deviation of FIV and differences between PIC and FIV were reported in Table S1.

Table S1. Means and standard deviations of FIV and differences between PIC and FIV among hemorrhage subtypes

|                    | subgroup | N  | mean   | SD     |
|--------------------|----------|----|--------|--------|
| FIV                | No ICH   | 28 | 22,64  | 23,747 |
|                    | HI1      | 4  | 34,2   | 28,839 |
|                    | HI2      | 7  | 15,6   | 6,189  |
|                    | PH1      | 7  | 64,25  | 44,88  |
|                    | PH2      | 13 | 107,15 | 46,925 |
| FIV-PIC difference | No ICH   | 28 | 9,32   | 20,692 |
|                    | HI1      | 4  | 9,6    | 10,502 |
|                    | HI2      | 7  | 7,6    | 6,025  |
|                    | PH1      | 7  | 39     | 37,603 |
|                    | PH2      | 13 | 76,23  | 47,078 |

ICH: intracerebral hemorrhages; HI: hemorrhagic infarction; PH: parenchymal hematoma

- A Kruskal-Wallis Test for non parametric independent variable was conducted in the whole sample to examine the differences between mRS outcomes according to the types of hemorrhagic transformation. A significant effect of hemorrhage type (Chi square = 23.72,  $p = .000$ ,  $df = 4$ ) was found on mRS outcome. A post hoc analysis with Bonferroni correction showed a significant difference between NO ICH and PH1 group (Chi square = -26.72,  $p = .021$ ), and between PH2 and NO-ICH group

(Chi square -26,26  $p=.000$ , for HI1, Chi square -18,64  $p=.041$ ). No significant differences were found among PH2 and PH1 and PH2 and H2 for the main outcome.

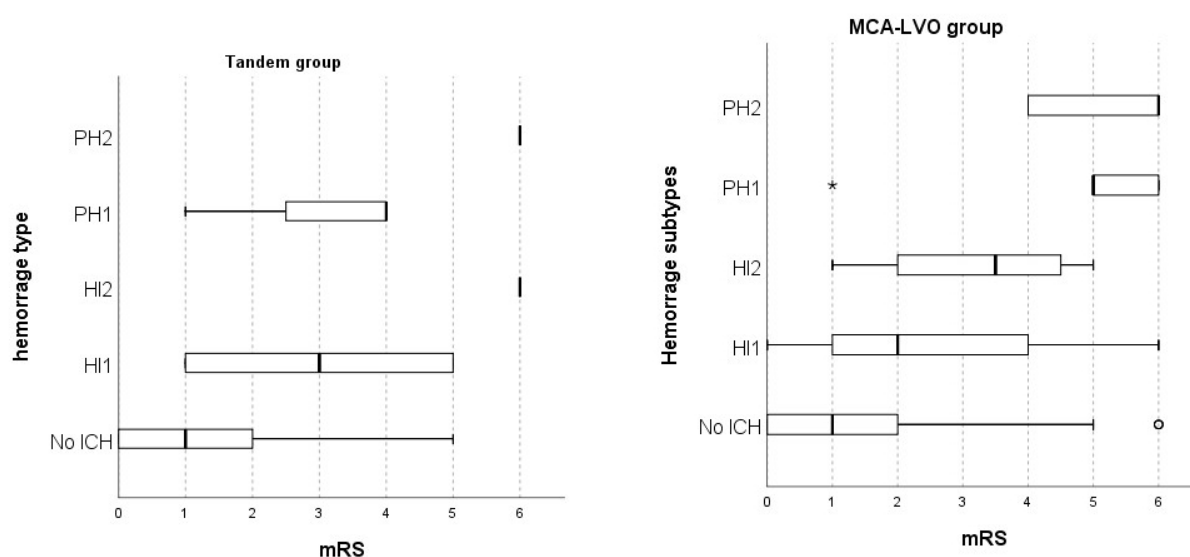

Figure S3. Outcome distributions between different subtypes of postprocedural hemorrhagic transformation

- Secondary analysis performed by excluding patient who suffered a hemorrhagic transformation with mass effect (PH2) and partially recanalized patients (TICI 2b or 2c)

Table S2. Comparisons between groups for baseline features.

|                              | Tandem (18) | MCA-LVO (28) | <i>p</i> |
|------------------------------|-------------|--------------|----------|
| Gender, n (%)                |             |              |          |
| Male                         | 10 (52,6)   | 12 (43,3)    | .569     |
| Female                       | 8 (47,4)    | 16 (56,7)    | .569     |
| Age, median (IQR)            | 67 (15)     | 73,5 (17)    | .192     |
| Pre stroke mrs, median (IQR) | 0 (0)       | 0 (0)        | > 0,05   |
| Arterial Hypertension, n (%) | 16 (84,2)   | 21 (70)      | .323     |
| Missing 1                    |             |              |          |
| Atrial Fibrillation, n (%)   | 7 (36,8)    | 12 (40)      | .852     |
| Missing 1                    |             |              |          |
| Hypercholesterolemia (%)     | 4 (21,1)    | 7 (23,3)     | .825     |
| Missing 1                    |             |              |          |
| Diabetes, n (%)              | 2 (10,5)    | 3 (10)       | .953     |
| Missing 1                    |             |              |          |
| Smoking, n (%)               | 3 (15,8)    | 5 (16,7)     | .935     |
| Missing 1                    |             |              |          |
| Alcohol (%)                  | 2 (10,5%)   | 0            | .145     |
| Missing 1                    |             |              |          |
| Etiology - TOAST (%):**      |             |              | .057     |
| Undetermined                 | 3 (15,8)    | 10 (33,3)    |          |
| Large artery                 | 9 (52,6)    | 5 (16,7)     |          |
| Cardioembolic                | 4 (21,1)    | 10 (40)      |          |
| Other                        | 2 (10,5)    | 3 (10)       |          |
| ASPECTS, median (IQR)        | 9 (2)       | 10 (2)       | .097     |
| Good collateral Score, n (%) | 13 (68,4)   | 22 (73,3)    | .754     |

|                                 |                 |                |                 |
|---------------------------------|-----------------|----------------|-----------------|
| NIHSS, median (IQR)             | 19 (7)          | 15,5 (10)      | .677            |
| Clot Burden score, median (IQR) | 4 (2)           | 6 (2)          | <b>&lt;.001</b> |
| Occlusion site, n (%)           |                 |                | .524            |
| M1 prox                         | 14 (78,9)       | 21 (70)        |                 |
| M1 dist                         | 0               | 3 (10)         |                 |
| M2                              | 4 (21,1)        | 6 (20)         |                 |
| Occlusion side, n (%)           |                 |                | .596            |
| left                            | 9 (50)          | 14 (46,7)      |                 |
| right                           | 9 (50)          | 16 (53,3)      |                 |
| Systolic Blood pressure         | 144 (26,97)     | 129,54 (18,10) |                 |
| Missing 2C+2T                   |                 |                |                 |
| Diastolic blood pressure        | 91 (20,49)      | 74,11 (10,54)  |                 |
| Missing 2C+2T                   |                 |                |                 |
| Glycemia                        | 117, 11 (40,34) | 117,11(27,62)  |                 |
| Missing 2C+2T                   |                 |                |                 |

Table S3. Procedural times and strategies.

|                                 | Tandem (n=18)   | Controls (n=28)  | P           |
|---------------------------------|-----------------|------------------|-------------|
| Onset to groin (SD)             | 262,36 (198,04) | 253,22 (122, 17) | .129        |
| Missing**: 4T+12C               |                 |                  |             |
| Onset to CTP (SD)               | 207,00 (209,08) | 189,00 (113,20)  | .123        |
| Missing: 4T+12C                 |                 |                  |             |
| CTP to recanalization (SD)      | 129,74 (42,46)  | 102,7 (34,07)    | <b>.035</b> |
| Missing:                        |                 |                  |             |
| Onset to reperfusion, mean (SD) | 330,5 (208,55)  | 298,22 (121,11)  | .343        |
| Missing: 4T+12C                 |                 |                  |             |
| Procedural time, mean (SD)      | 66,32 (49,60)   | 36,93 (23,62)    | <b>.016</b> |
| Missing:                        |                 |                  |             |
| Rtpa, n (%)                     | 6 (31,6)        | 6 (20)           | .468        |
| General anesthesia              | 0               | 2 (6,7)          | .515        |
| Passages: Median (IQR)          | 2 (2)           | 1 (1)            | <b>0.03</b> |
| Technique:                      |                 |                  | .019*       |
| Thromboaspiration (%)           | 11 (62,2)       | 28 (93,3)        |             |
| Stent retriever (%)             | 0               | 0                |             |
| Solumbra (%)                    | 7 (36,8)*       | 2 (6,7)          |             |
